# Supplementary material
Source: PubMed Central journal article supplement (PMC1479894)
Supplement: NIHMS4823-supplement-SFig2.pdf [file NIHMS4823-supplement-SFig2.pdf]

## HSP-16::GFP Expression in Individual Worms Predicts Subsequent Survival.

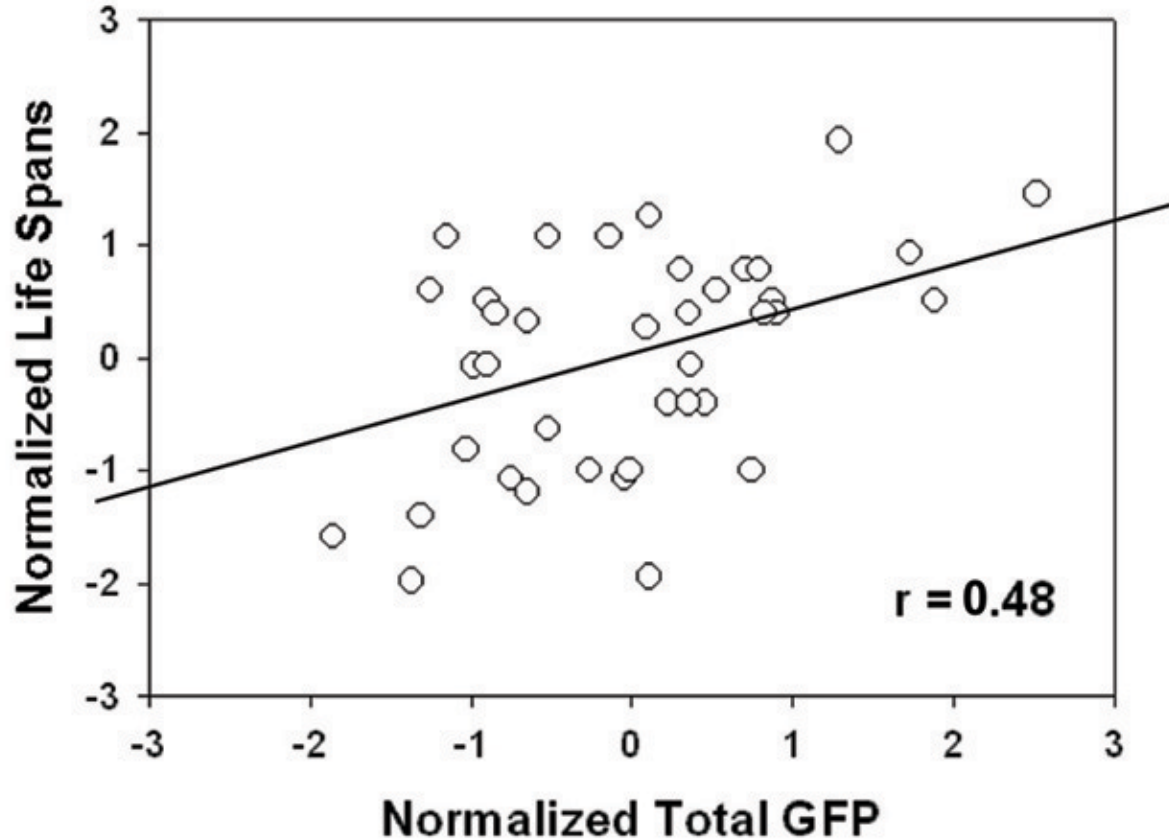

**Supplementary Figure 2.** Expression of HSP-16::GFP in individual worms predicts subsequent survival. Data were collected from three replicate experiments. TJ375 worms were grown synchronously from birth on NGM agar at 20°C and shifted to 31-32°C at three or four days of age, for two hours. This results in a mild induction of the HSP-16 gene, which was digitally quantitated. Altogether a total of 39 worms were included in these experiments - every worm that was not lost, censored, or killed during the assessments. Normalization was employed because different replicate experiments resulted in different absolute levels of GFP expression and in different life expectancies. Overall correlation coefficient was 0.48,  $P = 0.002$ .
