# Supplementary material
Source: PubMed Central journal article supplement (PMC1479894)
Supplement: NIHMS4823-supplement-SFig3.pdf [file NIHMS4823-supplement-SFig3.pdf]

## Differential Expression of MTL-2::GFP or MYO-2::GFP are not Predictors of Subsequent Survival.

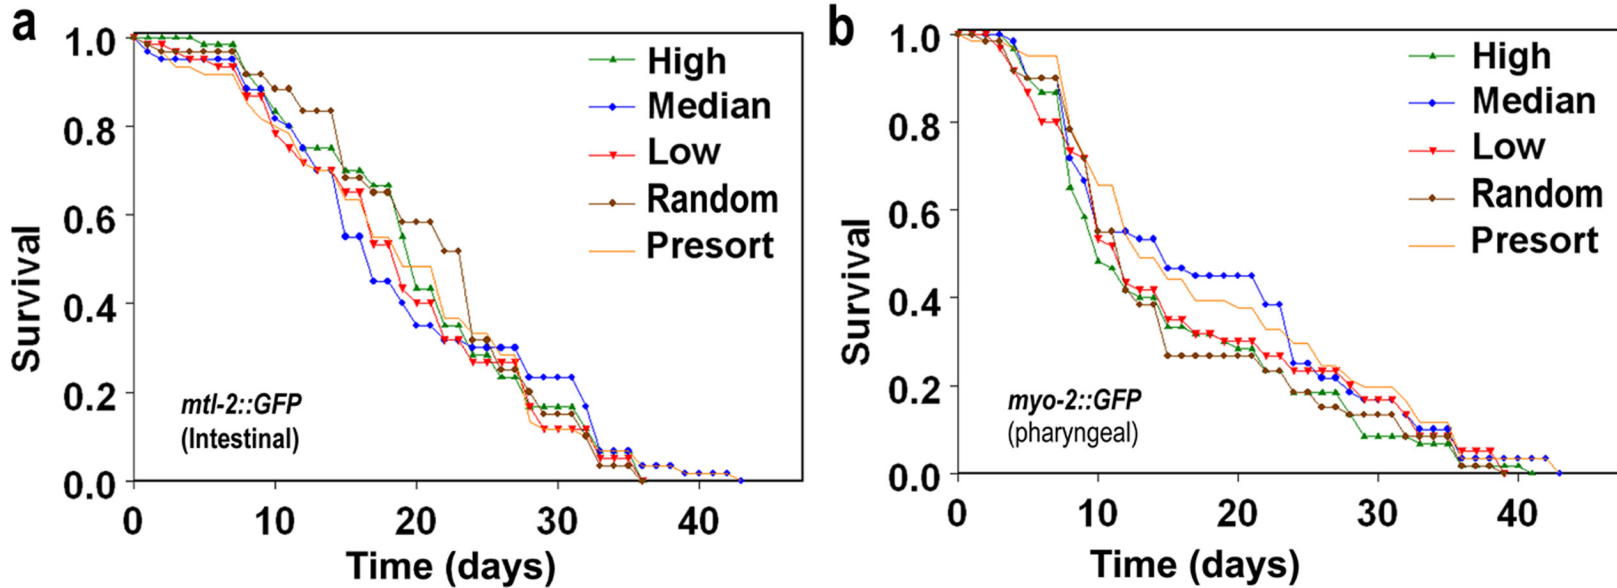

**Supplementary Figure 3.** Additional GFP reporter constructs that are not biomarkers for longevity. CL2122 and PD4788 worms constitutively express GFP under the control of the *mtl-2* and *myo-2* promoters as adults, respectively. The COPAS biosorter was used to isolate either constitutively High, Intermediate or Low GFP-expressing populations and then survival was assessed (N = 60 for each subpopulation). Controls include an unsorted population and a sorted but unselected population (Random). The curves are not significantly different ( $P$  all >0.1). (See also Supplementary Table I).
