# Supplementary material
Source: PubMed Central journal article supplement (PMC1479894)
Supplement: NIHMS4823-supplement-STable1.pdf [file NIHMS4823-supplement-STable1.pdf]

**Supplementary Table I. Mean Lifespan – Selected Longevity Assays**

| Refer to            | Strain | Mean Lifespan  |                |             |                  |               |          |               |               |          | Z test                |                    |                      |
|---------------------|--------|----------------|----------------|-------------|------------------|---------------|----------|---------------|---------------|----------|-----------------------|--------------------|----------------------|
|                     |        | High<br>(days) | SEM*<br>(days) | <i>N</i> ** | Median<br>(days) | SEM<br>(days) | <i>N</i> | Low<br>(days) | SEM<br>(days) | <i>N</i> | High<br>vs.<br>Median | High<br>vs.<br>Low | Median<br>vs.<br>Low |
| <b>Fig. 2a</b>      | TJ375  | 16.4           | 1.5            | 30          | 11.3             | 0.7           | 30       | 3.2           | 0.37          | 30       | 0.001                 | 1.0E-10            | 1.0E-10              |
| <b>Fig. 2c</b>      | TJ375  | 15.13          | 0.61           | 530         | 12.92            | 0.56          | 545      | 7.13          | 0.49          | 550      | 0.008                 | 1.0E-10            | 1.0E-10              |
| <b>Fig. 2c</b>      | TJ550  | 9.01           | 0.57           | 241         | 6.63             | 0.35          | 240      | 3.82          | 0.09          | 241      | 0.0004                | 1.0E-30            | 1.0E-15              |
| <b>Fig. 2d</b>      | TJ375  | 9.5            | 0.5            | 31          | 6.7              | 0.4           | 32       | 4.1           | 0.4           | 33       | 9.0E-7                | 1.0E-10            | 3.0E-6               |
| <b>Fig. 2f</b>      | TJ375  | 10.07          | 0.20           | 394         | 8.27             | 0.15          | 401      | 6.68          | 0.18          | 404      | 1.0E-10               | 1.0E-10            | 1.0E-10              |
| <b>Fig. 3a</b>      | TJ375  | 24.4           | 1.1            | 40          | 18.7             | 1.1           | 40       | 15.4          | 1.0           | 40       | 0.003                 | 1.0E-10            | 0.025                |
| <b>Fig. 3c</b>      | TJ375  | 20.86          | 0.93           | 150         | 18.20            | 0.80          | 150      | 14.03         | 0.85          | 149      | 0.03                  | 6.0E-8             | 0.0003               |
| <b>Fig. 3f</b>      | CL2166 | 9.20           | 0.25           | 291         | 9.53             | 0.26          | 291      | 9.88          | 0.34          | 291      | 0.36                  | 0.09               | 0.38                 |
| <b>Supp. Fig. 2</b> | CL2122 | 20.0           | 1.1            | 60          | 19.1             | 1.3           | 60       | 18.7          | 1.2           | 60       | 0.6                   | 0.4                | 0.8                  |
| <b>Supp. Fig. 2</b> | PD4788 | 14.6           | 1.3            | 60          | 17.5             | 1.4           | 60       | 15.6          | 1.4           | 60       | 0.12                  | 0.62               | 0.32                 |

\* SEM: standard error of the mean.

\*\* *n* : number of animals scored.
