# Supplementary material
Source: PubMed Central journal article supplement (PMC1479894)
Supplement: NIHMS4823-supplement-STableII.pdf [file NIHMS4823-supplement-STableII.pdf]

**Supplementary Table II. Mean Lifespan – All Longevity Assays**

| Experiment Identifier   | Strain | Length of Heat Shock (hours) | Sort Time (hours) | HIGH                 |            | LOW                  |          | <i>p</i> value |
|-------------------------|--------|------------------------------|-------------------|----------------------|------------|----------------------|----------|----------------|
|                         |        |                              |                   | Mean Lifespan (days) | <i>n</i> * | Mean Lifespan (days) | <i>n</i> |                |
| <b>Refer to Fig. 3b</b> |        |                              |                   |                      |            |                      |          |                |
| Oct. 31                 | TJ375  | 1                            | 9                 | 13.4                 | 40         | 9.5                  | 40       | 0.001          |
| Nov. 4                  | TJ375  | 1                            | 10                | 26.0                 | 40         | 19.3                 | 40       | 0.02           |
| Nov. 4                  | TJ375  | 1                            | 10                | 24.4                 | 40         | 15.4                 | 40       | 0.002          |
| Dec. 10                 | TJ375  | 1                            | 8                 | 20.8                 | 40         | 12.8                 | 40       | 0.002          |
| Dec. 13                 | TJ375  | 1                            | 18                | 31.2                 | 40         | 30.1                 | 40       | 0.68           |
| Dec. 13                 | TJ375  | 1                            | 36                | 30.1                 | 40         | 20.1                 | 40       | 0.0004         |
| Dec. 13                 | TJ375  | 1                            | 9                 | 26.1                 | 40         | 15.0                 | 40       | 0.0004         |
| Dec.13                  | TJ375  | 1                            | 18                | 28.3                 | 40         | 24.5                 | 40       | 0.23           |
| Dec.13                  | TJ375  | 1                            | 36                | 33.2                 | 40         | 18.7                 | 40       | <1E-10         |
| <b>Refer to Fig. 2b</b> |        |                              |                   |                      |            |                      |          |                |
| May 24                  | TJ375  | 2                            | 4                 | 6.2                  | 50         | 5.8                  | 63       | 0.72           |
| May 24                  | TJ375  | 2                            | 9                 | 16.8                 | 50         | 5.2                  | 50       | <1E-10         |
| May 24                  | TJ375  | 2                            | 18                | 18.2                 | 50         | 3.0                  | 44       | <1E-10         |
| May 24                  | TJ375  | 2                            | 28                | 12.7                 | 49         | 3.7                  | 50       | <1E-10         |
| Sept. 23                | TJ375  | 2                            | 9                 | 16.4                 | 70         | 3.2                  | 80       | <1E-10         |
| Oct. 11                 | TJ375  | 2                            | 8                 | 12.6                 | 30         | 15.7                 | 30       | 0.14           |
| Oct. 11                 | TJ375  | 2                            | 8                 | 23.9                 | 30         | 12.2                 | 30       | 0.003          |
| Oct. 11                 | TJ375  | 2                            | 8                 | 24.1                 | 30         | 20.4                 | 30       | 0.24           |
| Oct. 31                 | TJ375  | 2                            | 10                | 11.4                 | 30         | 4.9                  | 30       | 0.0009         |
| Oct. 31                 | TJ375  | 2                            | 10                | 6.9                  | 30         | 5.3                  | 30       | 0.2            |
| Oct. 31                 | TJ375  | 2                            | 10                | 7.5                  | 40         | 3.7                  | 43       | 0.0001         |
| Nov. 4                  | TJ375  | 2                            | 10                | 24.4                 | 40         | 15.4                 | 40       | 0.001          |
| Nov. 4                  | TJ375  | 2                            | 10                | 21.3                 | 31         | 14.2                 | 30       | 0.03           |
| Dec. 13                 | TJ550  | 2                            | 9                 | 5.3                  | 40         | 4.1                  | 40       | 0.02           |
| Dec. 13                 | TJ550  | 2                            | 18                | 11.7                 | 40         | 3.7                  | 40       | 1.0E-7         |
| Dec. 13                 | TJ550  | 2                            | 36                | 8.8                  | 40         | 3.6                  | 40       | 1.0E-7         |
| Dec. 13                 | TJ550  | 2                            | 9                 | 6.7                  | 40         | 4.3                  | 40       | 0.0004         |
| Dec. 13                 | TJ550  | 2                            | 18                | 10.3                 | 40         | 3.5                  | 41       | <1E-10         |
| Dec. 13                 | TJ550  | 2                            | 36                | 11.1                 | 40         | 3.8                  | 40       | <1E-10         |

\* *n* : number of animals scored.
