# Supplementary material
Source: PubMed Central journal article supplement (PMC1479894)
Supplement: NIHMS4823-supplement-STableIII.pdf [file NIHMS4823-supplement-STableIII.pdf]

### Supplementary Table III.

#### Mean Survival – Lethal Thermotolerance Assay (2 hr Heat Shock)

| Experiment Identifier   | Strain | Sort Time (hours) | HIGH                  |            | LOW                   |          | <i>p</i> value |
|-------------------------|--------|-------------------|-----------------------|------------|-----------------------|----------|----------------|
|                         |        |                   | Mean Survival (hours) | <i>n</i> * | Mean Survival (hours) | <i>n</i> |                |
| <b>Refer to Fig. 2e</b> |        |                   |                       |            |                       |          |                |
| Apr. 30                 | TJ375  | 5                 | 13.2                  | 30         | 10.1                  | 30       | 0.001          |
| May 24                  | TJ375  | 4                 | 6.3                   | 30         | 5.6                   | 30       | 0.14           |
| May 24                  | TJ375  | 9                 | 9.0                   | 31         | 5.2                   | 30       | 0.00001        |
| May 24                  | TJ375  | 18                | 9.5                   | 31         | 4.1                   | 33       | <1E-10         |
| May 24                  | TJ375  | 28                | 9.1                   | 30         | 3.8                   | 32       | <1E-10         |
| June 21                 | TJ375  | 9                 | 15.4                  | 30         | 9.4                   | 31       | <1E-10         |
| June 21                 | TJ375  | 18                | 15.2                  | 30         | 11.8                  | 31       | 0.003          |
| Aug. 6                  | TJ375  | 11                | 11.2                  | 33         | 6.0                   | 36       | <1E-10         |
| Sept. 19                | TJ375  | 9                 | 7.6                   | 30         | 5.8                   | 30       | 0.00004        |
| Sept. 23                | TJ375  | 9                 | 9.1                   | 30         | 7.0                   | 31       | <1E-10         |
| Oct. 1                  | TJ375  | 10                | 8.5                   | 30         | 4.1                   | 30       | <1E-10         |
| Oct. 31                 | TJ375  | 10                | 7.2                   | 29         | 5.5                   | 30       | 0.006          |
| Nov. 4                  | TJ375  | 10                | 9.1                   | 30         | 7.5                   | 30       | 0.001          |
| Dec. 13                 | TJ550  | 9                 | 11.1                  | 30         | 11.0                  | 30       | 0.95           |
| Dec. 13                 | TJ550  | 18                | 16.2                  | 31         | 9.3                   | 31       | <1E-10         |
| Dec. 13                 | TJ550  | 36                | 13.9                  | 31         | 7.4                   | 30       | <1E-10         |

\* *n* : number of animals scored.
