# Supplementary material
Source: PubMed Central journal article supplement (PMC1479894)
Supplement: NIHMS4823-supplement-STableIV.pdf [file NIHMS4823-supplement-STableIV.pdf]

**Supplementary Table IV.  $p$  value for Log Rank Test**

| <b>High vs. Low</b>     | <b>High vs. Median</b> | <b>Median vs. Low</b> |
|-------------------------|------------------------|-----------------------|
| <b>Refer to Fig. 3d</b> |                        |                       |
| 1.0E-10                 | 0.001                  | 1.0E-10               |
| <b>Refer to Fig. 3e</b> |                        |                       |
| 0.04                    | -                      | -                     |
